# Supplementary material for: Evaluation of Biological Toxicity of CdTe Quantum Dots with Different Coating Reagents according to Protein Expression of Engineering Escherichia coli
Source: Hindawi journal article supplement (doi:10.1155/2015/583963), 2015-01-01
Supplement: f1 [file 583963.f1.doc]

**Supporting Information**

Evaluation of biological toxicity of CdTe quantum dots with different coating reagents according to protein expression of engineering *Escherichia coli*

Wei Xu *a*, Ting Du *a*, Chaoyong Xu *a*, Heyou Han *a*, Jiangong Liang *a*,*, Shaobo Xiao*b**

a College of Science, State Key Laboratory of Agricultural Microbiology, Huazhong Agricultural University, Wuhan 430070 PR China.

b College of Veterinary Medicine, State Key Laboratory of Agricultural Microbiology, Huazhong Agricultural University, Wuhan 430070 PR China.

Correspondence should be addressed to Jiangong Liang, [liangjg@mail.hzau.edu.cn](mailto:liangjg@mail.hzau.edu.cn) and Shaobo Xiao,[xiaoshaobo@mail.hzau.edu.cn](mailto:xiaoshaobo@mail.hzau.edu.cn).

**Figure S1** The XRD patterns of Cys-CdTe QDs (A), GSH-CdTe QDs (B) and MPA-CdTe QDs (C).

The XRD patterns of CdTe QDs were obtained by a Bruker-D8 Advanced X-ray diffractometer. As shown in Fig. S1, the XRD patterns of Cys-CdTe QDs (Fig. S1A), GSH-CdTe QDs (Fig. S1B) and MPA-CdTe QDs (Fig. S1C) were similar. The 2*θ* values of 26.3◦ and 39.2◦, corresponding to the crystal planes (111) and (220) of cubic CdTe phase [1].

[1] Z. Xiao, D. Liu, Z. Tang, H. Li, M. Yuan. Synthesis and Characterization of Poly(Lactic Acid)-Conjugated Cdte Quantum Dots. *Mater. Lett.* 148 (2015) 126-129.
